# Supplementary material for: Beliefs about Polypharmacy among Home-Dwelling Older Adults Living with Multiple Chronic Conditions, Informal Caregivers and Healthcare Professionals: A Qualitative Study
Source: MDPI journal article supplement (doi:10.3390/healthcare9091204), 2021-09-13
Supplement: s1 [file s1]

## Journal de vos pratiques de médication

## Gestion des médicaments chez la personne vivant à domicile avec des conditions médicales chroniques

Jour : ..... Date : .....

Code du participant : PA-18

Cher participant, voici quelques questions auxquelles nous vous invitons à répondre lors de vos prises de médicaments :

| Moment de la journée de prises de médicaments | Quels médicaments avez-vous pris ?                                  | A quel endroit et à quel moment avez-vous pris vos médicaments ? | Qui était présent lors de votre prise de médicaments ? | Étiez-vous plutôt content de prendre vos médicaments ? Ou plutôt mécontent ? | Avez-vous d'autres commentaires ou sentiments à nous transmettre à propos de vos prises de médicaments ? |
|-----------------------------------------------|---------------------------------------------------------------------|------------------------------------------------------------------|--------------------------------------------------------|------------------------------------------------------------------------------|----------------------------------------------------------------------------------------------------------|
| Matin                                         | - Ass Cardio-Mepha 100mg<br>- Meto Zevok 150<br>- Epril subnite 5mg | - Après le petit-déjeuner<br>- A la salle à manger               | Mon épouse                                             | Par obligation !                                                             | Non                                                                                                      |
| Midi                                          |                                                                     |                                                                  |                                                        |                                                                              |                                                                                                          |
| Après - midi                                  |                                                                     |                                                                  |                                                        |                                                                              |                                                                                                          |
| Soir                                          | - Sintrom 1 milis<br>- Atorvastatin 80mg                            | A la cuisine avant d'aller dormir                                | Mon épouse                                             | Par obligation !                                                             | Non                                                                                                      |
| Nuit                                          |                                                                     |                                                                  |                                                        |                                                                              |                                                                                                          |

Basé sur les articles scientifiques suivants :

Dew, K., Norris, P., Gabe, J., Chamberlain, K., & Hodgetts, D. (2015). Moral discourses and pharmaceuticalised governance in households. *Social Science & Medicine*, 131, 272-279

Knight, D. A., Thompson, D., Mathie, E., & Dickinson, A. (2013). 'Seamless care? Just a list would have helped!' Older people and their carer's experiences of support with medication on discharge home from hospital. *Health Expectations*, 16(3), 277-291
